# Supplementary material for: Coke-promoted Ni/CaO catal-sorbents in the production of cyclic CO and syngas
Source: Royal Society of Chemistry journal article supplement (doi:10.1039/d1se01136g), 2021-12-01
Supplement: d1se01136g1.pdf [file d1se01136g1.pdf]

## Appendix A. Supplementary data

### Coke-promoted Ni/CaO catal-sorbent in a cyclic CO and syngas production process

Seongbin Jo<sup>a</sup>, Jong Heon Lee<sup>b</sup>, Jin Hyeok Woo<sup>b</sup>, Tae Young Kim<sup>b</sup>, Ho-Jung Ryu<sup>d</sup>, Byungwook Hwang<sup>d</sup>, Jae Chang Kim<sup>b,†</sup>, Soo Chool Lee<sup>c,†</sup> and Kandis Leslie Gilliard-AbdulAziz<sup>a,e,†</sup>

<sup>a</sup> *Department of Chemical and Environmental Engineering, University of California–Riverside, Riverside, California 92521, United States*

<sup>b</sup> *Department of Chemical Engineering, Kyungpook National University, Daegu, 41566, Republic of Korea*

<sup>c</sup> *Research Institute of Advanced Energy Technology, Kyungpook National University, Daegu, 41566, Republic of Korea*

<sup>d</sup> *Korea Institute of Energy Research, Daejeon 34129, Republic of Korea*

<sup>e</sup> *Department of Material Science and Engineering, University of California–Riverside, Riverside, California 92521, United States*

<sup>†</sup> **To whom all correspondence should be addressed.**

**E-mail address:** [kjchang@knu.ac.kr](mailto:kjchang@knu.ac.kr) (J.C. Kim), [soochool@knu.ac.kr](mailto:soochool@knu.ac.kr) (S.C. Lee),

[klabdulaziz@engr.ucr.edu](mailto:klabdulaziz@engr.ucr.edu) (K.L. Gilliard-AbdulAziz)

**Table S1.** Metal  
NiO/CaO catal-sorbent

contents of the  
in fresh state

| Metal content (wt%) <sup>a</sup> |          |
|----------------------------------|----------|
| NiO/CaO                          | Ni : 9.3 |

<sup>a</sup> Obtained by ICP-OES

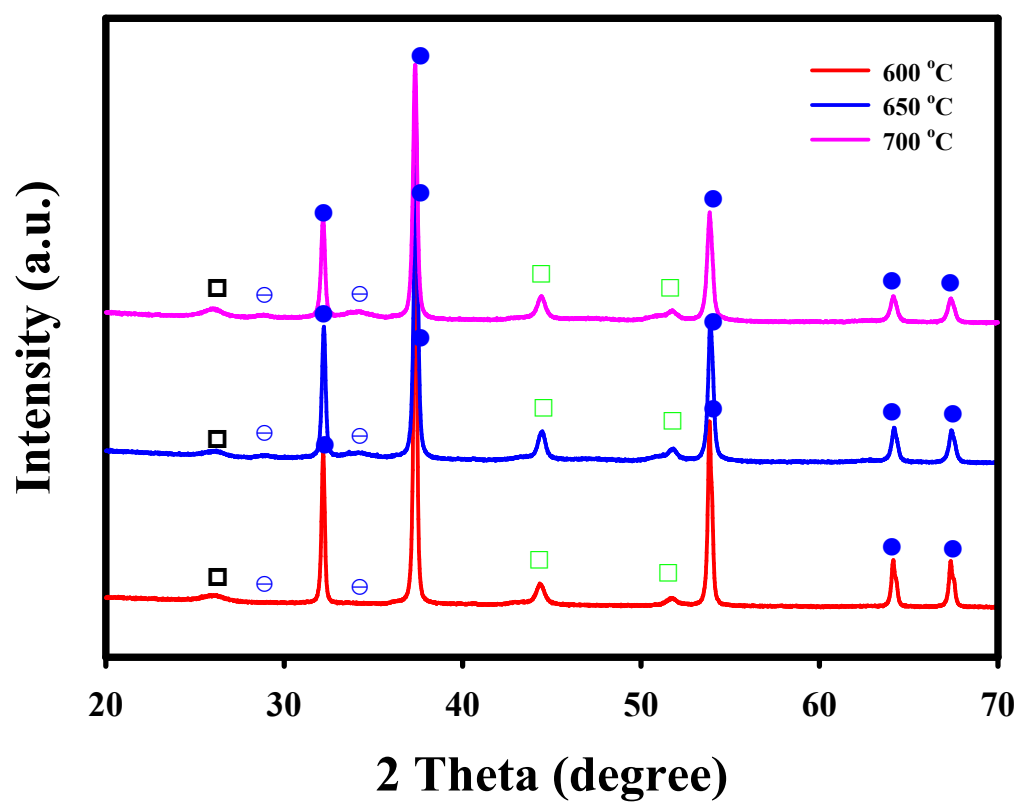

**Figure S1** XRD patterns of coke-promoted Ni/CaO (C-Ni/CaO) catal-sorbents reduced under 10% CH<sub>4</sub> at different temperatures (600, 650 and 700 °C): (■) NiO, (□) Ni<sup>0</sup>, (●) CaO, (⊖) Ca(OH)<sub>2</sub> and (▲) Coke.

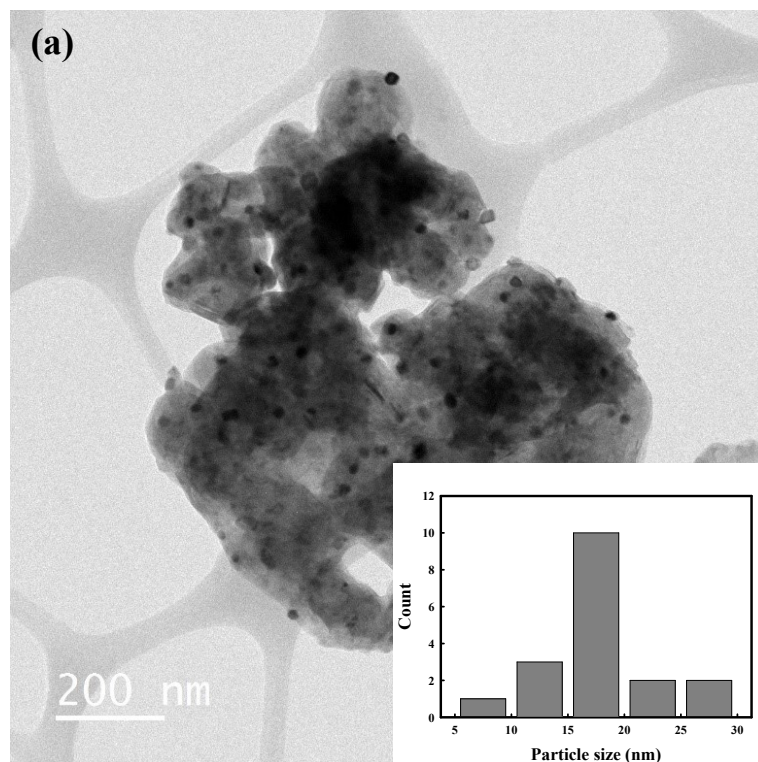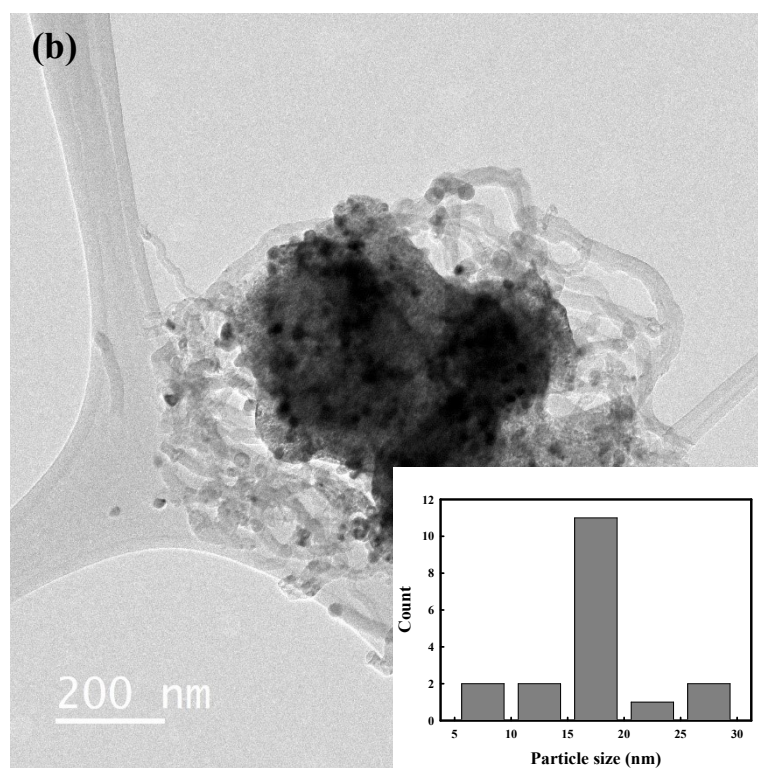

**Figure S2** TEM images and particle size distribution of (a) NiO/CaO and (b) C-Ni/CaO that were reduced at 650°C

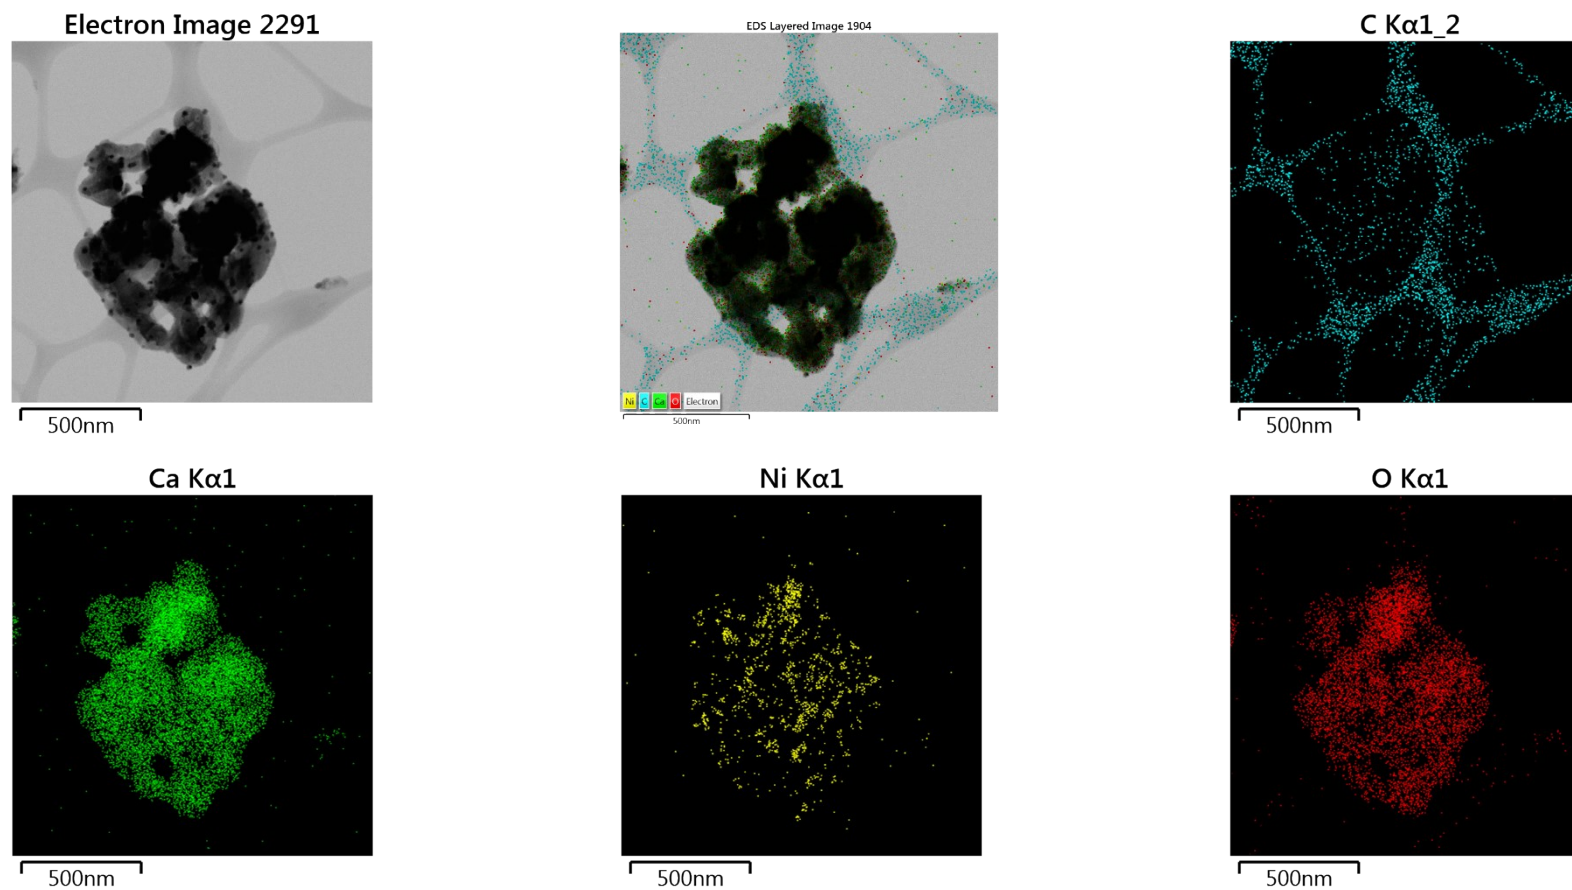

**Figure S3** TEM-EDS analysis of NiO/CaO catal-sorbent

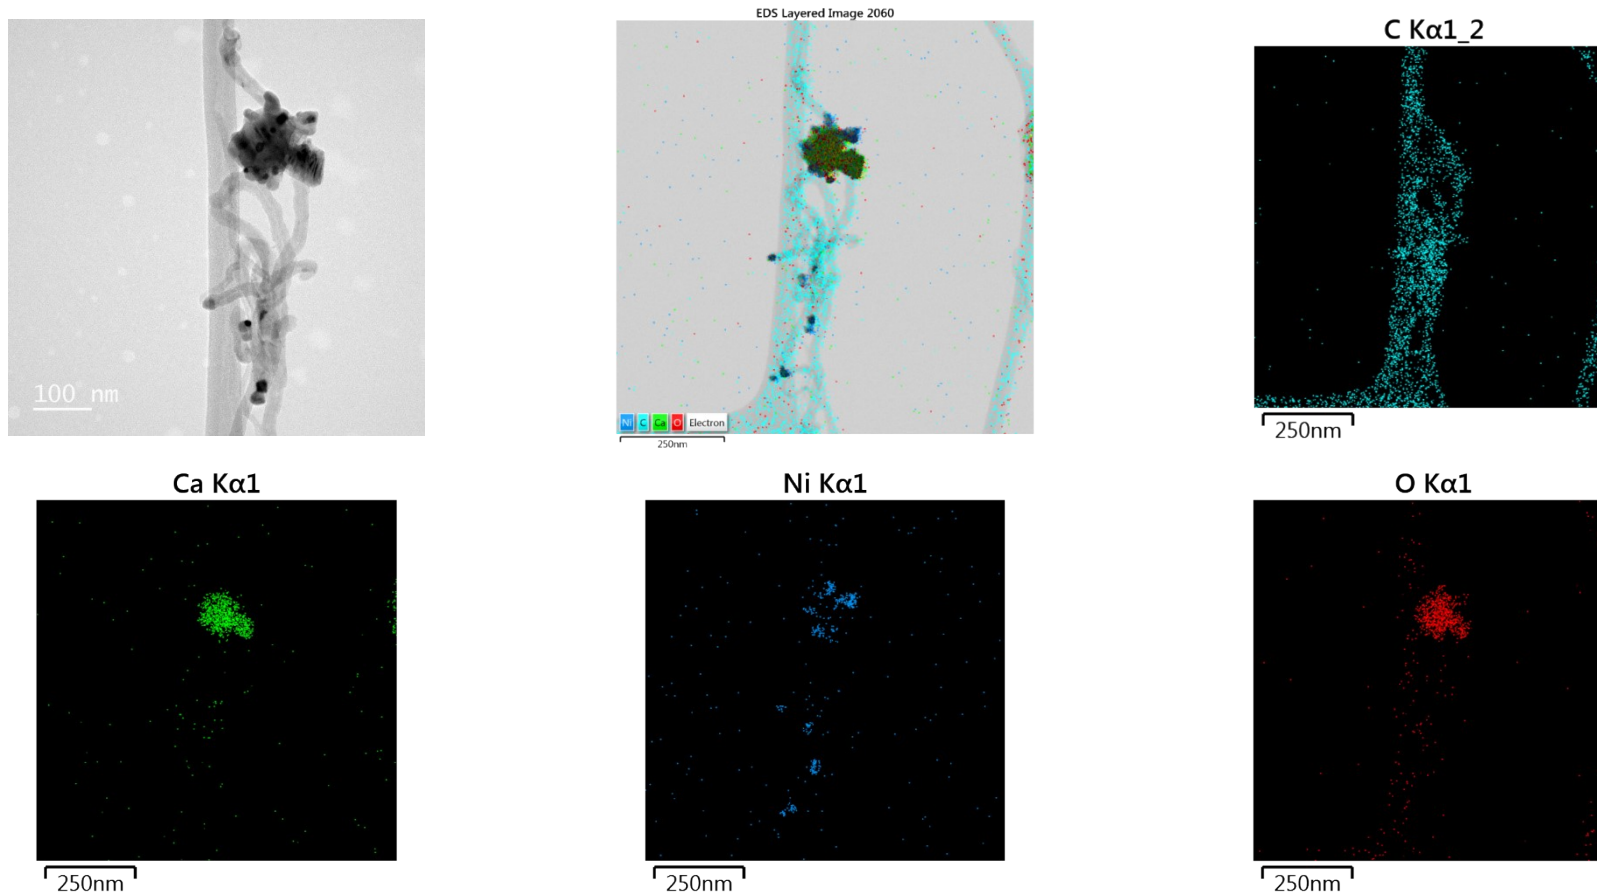

**Figure S4** TEM-EDS analysis of C-Ni/CaO catal-sorbent

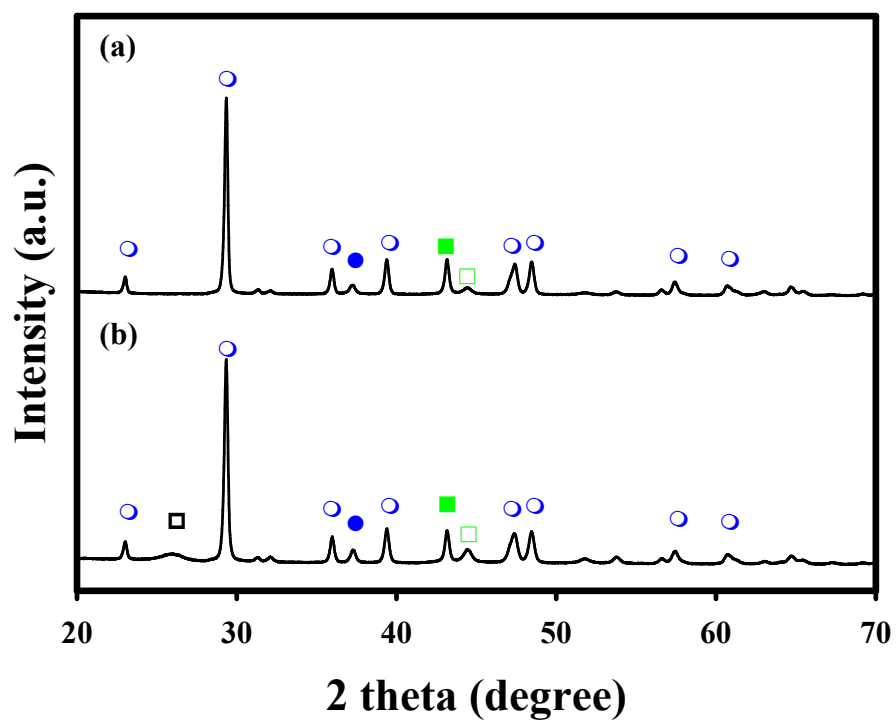

**Figure S5** XRD patterns of (a) Ni/CaO and (b) C-Ni/CaO catal-sorbents after CO<sub>2</sub> conversion step under 10 vol% CO<sub>2</sub> at 650 °C: (■) NiO, (□) Ni<sup>0</sup>, (●) CaO, and (▲) coke.

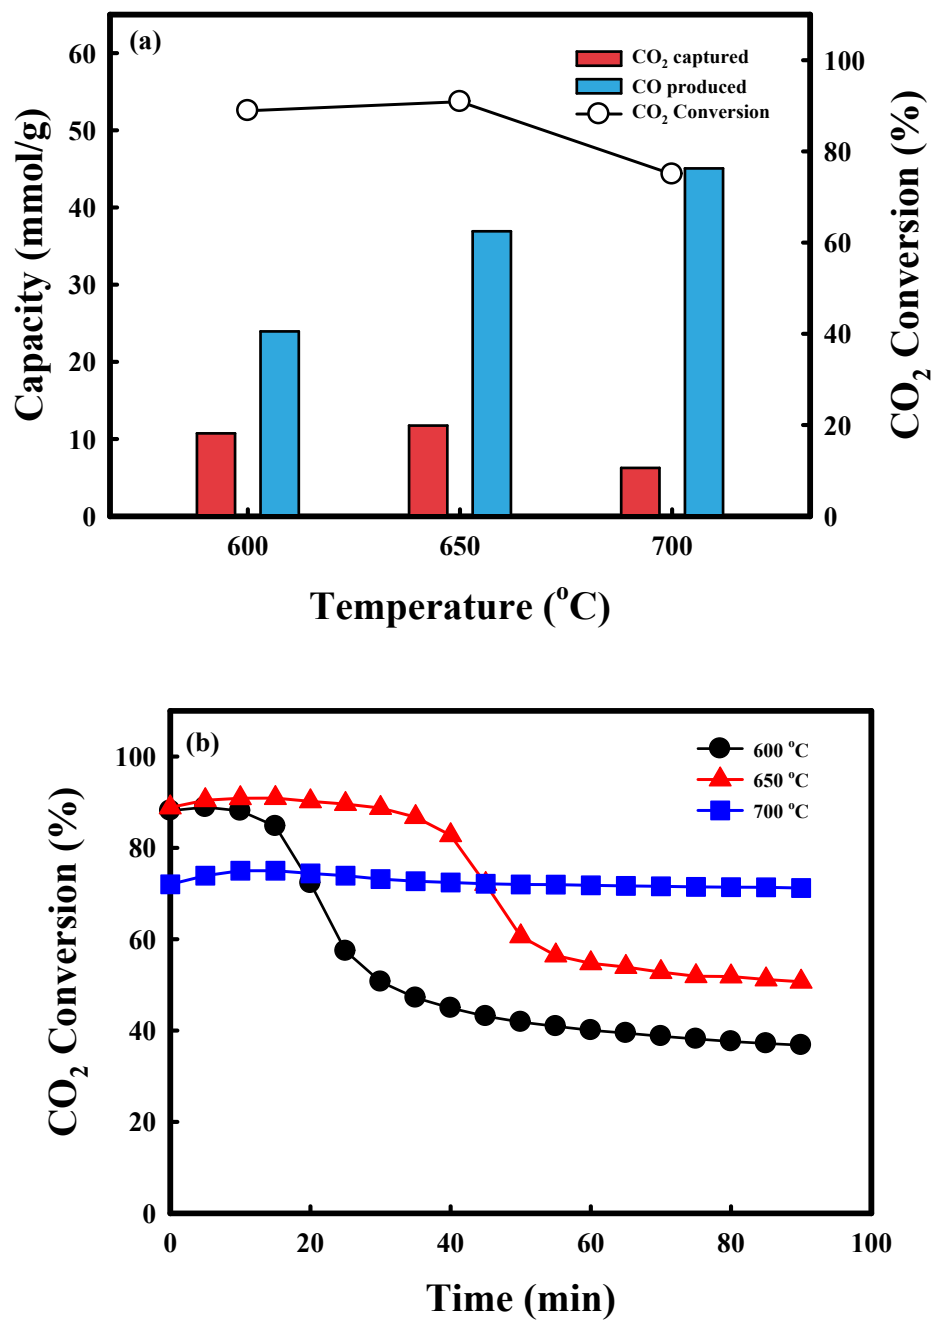

**Figure S6** (a) CO<sub>2</sub> consumption and CO production capacity and (b) CO<sub>2</sub> conversion over C-Ni/CaO catal-sorbent under 10 vol% CO<sub>2</sub> condition at different temperatures (600, 650 and 700 °C)



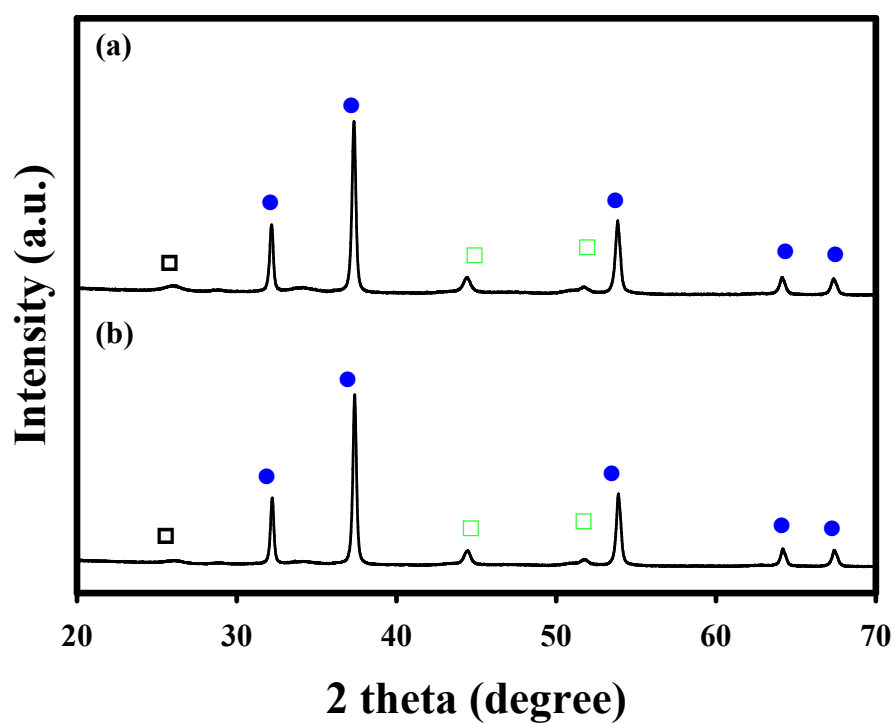

**Figure S7** XRD patterns of (a) NiO/CaO and (b) NiO/CaCO<sub>3</sub> catal-sorbents after CH<sub>4</sub> conversion step under 10 vol% CH<sub>4</sub> at 650 °C: (■) NiO, (□) Ni<sup>0</sup>, (●) CaO, and (▲) coke.

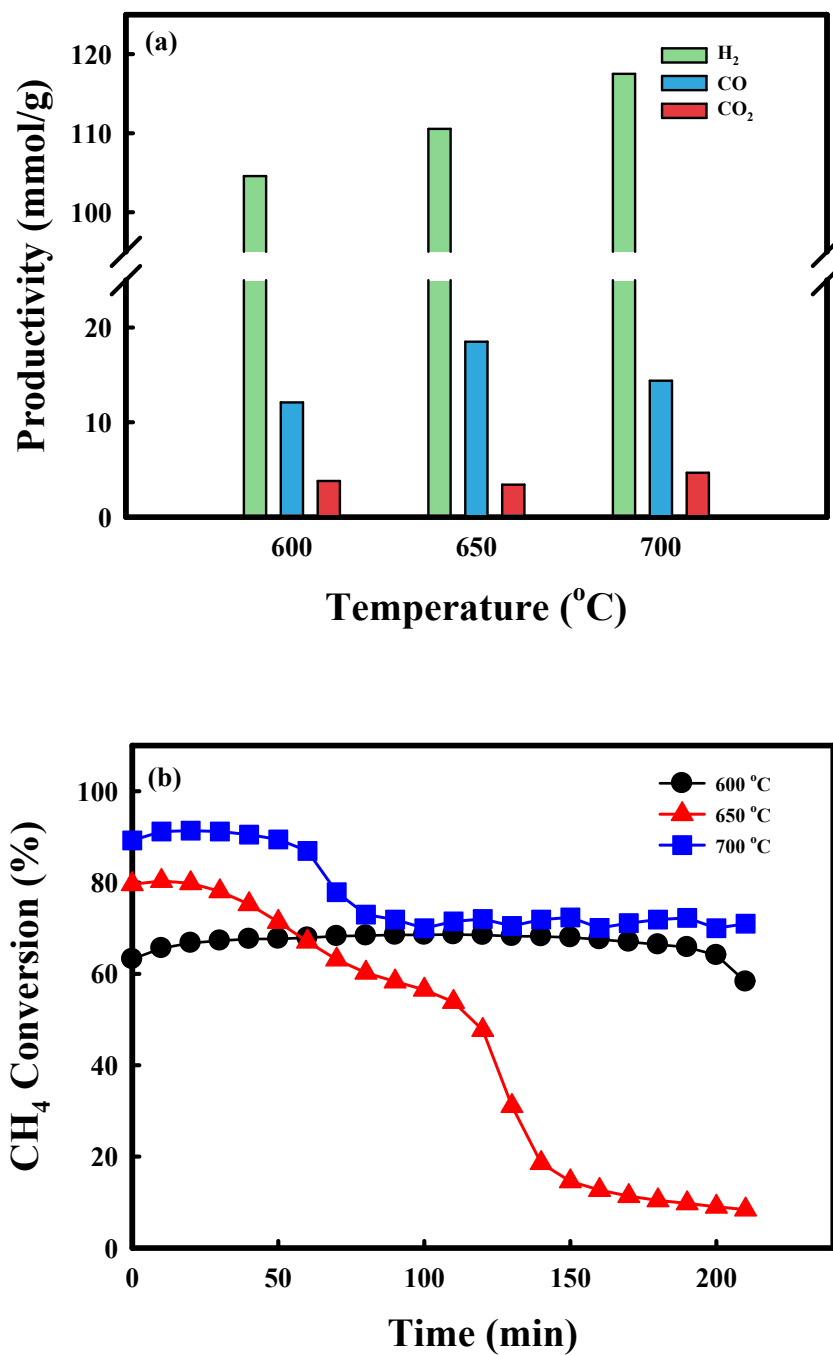

**Figure S8** (a) Syngas (H<sub>2</sub> and CO) productivity and desorbed CO<sub>2</sub> capacity and (b) CH<sub>4</sub> conversion over Ni/CaCO<sub>3</sub> catal-sorbent under 10 vol% CH<sub>4</sub> condition at different temperatures (600, 650 and 700 °C)

**Table S2** Amount of CO<sub>2</sub> captured, CO produced at CO<sub>2</sub> conversion step and CO produced, H<sub>2</sub> produced and coke accumulated at CH<sub>4</sub> conversion step in a consecutive 10 cycles

| Cycle                                                           | CO <sub>2</sub> conversion step         |                            | CH <sub>4</sub> conversion step |                                        |                                 |
|-----------------------------------------------------------------|-----------------------------------------|----------------------------|---------------------------------|----------------------------------------|---------------------------------|
|                                                                 | CO <sub>2</sub><br>captured<br>(mmol/g) | CO<br>produced<br>(mmol/g) | CO<br>produced<br>(mmol/g)      | H <sub>2</sub><br>produced<br>(mmol/g) | Coke<br>accumulated<br>(mmol/g) |
| 1                                                               | 10.5                                    | 35.9                       | 15.5                            | 75.7                                   | 58.2                            |
| 2                                                               | 11.2                                    | 34.4                       | 16.8                            | 66.0                                   | 65.6                            |
| 3                                                               | 11.3                                    | 34.2                       | 17.6                            | 63.7                                   | 71.6                            |
| 4                                                               | 11.9                                    | 34.0                       | 16.3                            | 60.3                                   | 76.6                            |
| 5                                                               | 11.1                                    | 33.9                       | 17.5                            | 62.8                                   | 82.3                            |
| 6                                                               | 10.7                                    | 34.7                       | 14.7                            | 56.5                                   | 85.8                            |
| 7                                                               | 8.1                                     | 34.3                       | 14.1                            | 48.3                                   | 85.8                            |
| 8                                                               | 9.1                                     | 33.5                       | 15.4                            | 46.7                                   | 84.7                            |
| 9                                                               | 9.5                                     | 33.0                       | 15.2                            | 46.7                                   | 84.0                            |
| 10                                                              | 9.5                                     | 33.9                       | 15.2                            | 47.6                                   | 83.2                            |
| Coke deposited in CH <sub>4</sub> treatment step: ~ 46.0 mmol/g |                                         |                            |                                 |                                        |                                 |

**Table S3** crystallite size of C-Ni/CaO catal-sorbents in a consecutive 10 cycles of CO<sub>2</sub> and CH<sub>4</sub> conversion steps.

|                                                   | Crystallite size (nm) <sup>a</sup> |      |                   |
|---------------------------------------------------|------------------------------------|------|-------------------|
|                                                   | Ni <sup>0</sup>                    | CaO  | CaCO <sub>3</sub> |
| As prepared C-Ni/CaO                              | 19.6                               | 37.7 |                   |
| After CO <sub>2</sub> conversion                  | 20.1                               | 27.1 | 34.9              |
| After 1 <sup>st</sup> CH <sub>4</sub> conversion  | 17.3                               | 30.3 |                   |
| After 5 <sup>th</sup> CH <sub>4</sub> conversion  | 17.5                               | 32.4 |                   |
| After 10 <sup>th</sup> CH <sub>4</sub> conversion | 22.0                               | 27.3 | 45.0              |

<sup>a</sup> Calculated by Scherrer equation
